# Supplementary material for: Cross-Sectional and Longitudinal Associations between 24-Hour Movement Behaviours, Recreational Screen Use and Psychosocial Health Outcomes in Children: A Compositional Data Analysis Approach
Source: MDPI journal article supplement (doi:10.3390/ijerph18115995), 2021-06-03
Supplement: s1 [file s1]

# Supplementary Material

**Table S1.** List of survey items used to assess sedentary recreational screen use.

| Activity Items Included in the Calculation of Sedentary Recreational Screen Time |                                                                                                                             |
|----------------------------------------------------------------------------------|-----------------------------------------------------------------------------------------------------------------------------|
| 1.                                                                               | Watching TV (including videos/DVDs)                                                                                         |
| 2.                                                                               | Using a computer/laptop for entertainment (e.g. watching videos/movies/YouTube, listening to music, surfing the net)        |
| 3.                                                                               | Using a smartphone/tablet (e.g. iPad) for entertainment (e.g. watching videos/YouTube, listening to music, surfing the net) |
| 4.                                                                               | Playing computer or video games (Nintendo, Xbox, PlayStation, Wii)                                                          |
| 5.                                                                               | Using any screen devices for social purposes (e.g. text/instant messaging, Facebook, Instagram, Snapchat, Tumblr, Twitter)  |

**Table S2.** Descriptive characteristics (Time 1) of the participants included and excluded from longitudinal analysis.

| Characteristics                    | Included Sample (n = 88) | Excluded Sample (n = 39) | p-value <sup>a</sup> |
|------------------------------------|--------------------------|--------------------------|----------------------|
| Age (years)                        | 11.8 (0.4)               | 11.5 (0.6)               | 0.015                |
| Sex, % girls                       | 59.1                     | 53.8                     | 0.58                 |
| Socio-economic status (SEIFA IRSD) | 1003 (44)                | 950 (79)                 | <0.0001              |
| BAZ                                | 0.41 (1.12)              | 0.50 (1.18)              | 0.67                 |
| Pubertal progression score         | 2.03 (0.55)              | 1.98 (0.55)              | 0.58                 |
| Psychosocial health                |                          |                          |                      |
| Internalising difficulties         | 5.4 (3.4)                | 5.7 (3.5)                | 0.65                 |
| Externalising difficulties         | 6.7 (3.2)                | 6.3 (3.3)                | 0.48                 |
| Total difficulties                 | 12.2 (5.7)               | 12.0 (6.1)               | 0.90                 |
| Prosocial behaviour                | 7.9 (1.9)                | 7.5 (1.7)                | 0.21                 |
| Psychological distress             | 21.2 (6.7)               | 22.2 (7.0)               | 0.45                 |

Data presented as mean (standard deviation) unless indicated. *SEIFA* Socio-economic Indicators for Areas, *IRSD* Index of Relative Social Disadvantage, *BAZ* body mass index z-score. <sup>a</sup> Differences between samples were tested using independent t-tests.

**Table S3.** Pairwise log-ratio variation matrix for sleep, sedentary time, light-intensity physical activity and moderate- to vigorous-intensity physical activity at baseline (T1).

| Movement behaviour | Cross-Sectional Sample (n=127) |       |       |       | Longitudinal Sample (n=88) |       |       |       |
|--------------------|--------------------------------|-------|-------|-------|----------------------------|-------|-------|-------|
|                    | Sleep                          | ST    | LPA   | MVPA  | Sleep                      | ST    | LPA   | MVPA  |
| Sleep              | 0                              | 0.010 | 0.014 | 0.117 | 0                          | 0.029 | 0.038 | 0.149 |
| ST                 | 0.010                          | 0     | 0.011 | 0.109 | 0.029                      | 0     | 0.062 | 0.224 |
| LPA                | 0.014                          | 0.011 | 0     | 0.129 | 0.038                      | 0.062 | 0     | 0.126 |
| MVPA               | 0.117                          | 0.109 | 0.129 | 0     | 0.149                      | 0.224 | 0.126 | 0     |

*Note.* Value ranges between 0 and 1, with a value closer to zero indicating higher co-dependency between the two behaviours. *ST* sedentary time, *LPA* light-intensity physical activity, *MVPA* moderate- to vigorous-intensity physical activity.

**Table S4.** Classifications of psychosocial health status, n (%).

| Classifications <sup>a</sup> | Cross-Sectional Sample (n = 127) | Longitudinal Sample (n = 88) |           |                                     |
|------------------------------|----------------------------------|------------------------------|-----------|-------------------------------------|
|                              |                                  | T1                           | T2        | p-value for difference <sup>b</sup> |
| Internalising Problems       |                                  |                              |           |                                     |
| Close to average (0–6)       | 82 (64.6)                        | 58 (65.9)                    | 59 (67.0) | 0.77                                |
| Slightly raised (7–8)        | 18 (14.2)                        | 14 (15.9)                    | 9 (10.2)  |                                     |
| High (9)                     | 5 (3.9)                          | 3 (3.4)                      | 8 (9.1)   |                                     |
| Very high (10–20)            | 22 (17.3)                        | 13 (14.8)                    | 12 (13.6) |                                     |
| Externalising problems       |                                  |                              |           |                                     |
| Close to average (0–8)       | 91 (71.7)                        | 64 (72.7)                    | 61 (69.3) | 0.86                                |

|                           |           |           |           |      |
|---------------------------|-----------|-----------|-----------|------|
| Slightly raised (9–10)    | 20 (15.7) | 12 (13.6) | 17 (19.3) |      |
| High (11–12)              | 10 (7.9)  | 6 (6.8)   | 6 (6.8)   |      |
| Very high (13–20)         | 6 (4.7)   | 6 (6.8)   | 4 (4.5)   |      |
| Total difficulties scores |           |           |           |      |
| Close to average (0–14)   | 86 (67.7) | 62 (70.5) | 59 (67.0) |      |
| Slightly raised (15–17)   | 16 (12.6) | 10 (11.4) | 11 (12.5) | 0.76 |
| High (18–19)              | 7 (5.5)   | 5 (5.7)   | 7 (8.0)   |      |
| Very high (20–40)         | 18 (14.2) | 11 (12.5) | 11 (12.5) |      |
| Prosocial behaviour       |           |           |           |      |
| Close to average (7–10)   | 94 (74.0) | 66 (75.0) | 69 (78.4) |      |
| Slightly raised (6)       | 16 (12.6) | 11 (12.5) | 8 (9.1)   | 0.68 |
| High (5)                  | 10 (7.9)  | 7 (8.0)   | 9 (10.2)  |      |
| Very high (0–4)           | 7 (5.5)   | 4 (4.5)   | 2 (2.3)   |      |
| Psychological distress    |           |           |           |      |
| Low (10–15)               | 21 (16.5) | 15 (17.0) | 21 (23.9) |      |
| Moderate (16–21)          | 54 (42.5) | 39 (44.3) | 30 (34.1) | 0.55 |
| High (22–29)              | 32 (25.2) | 23 (26.1) | 23 (26.1) |      |
| Very high (30–50)         | 20 (15.7) | 11 (12.5) | 14 (15.9) |      |

<sup>a</sup> The recommended score range for each classification category is presented in brackets. <sup>b</sup> Examined using McNemar-Bowker's test.
